# Supplementary material for: Machine Learning Classifiers for Predictive Biomarkers Combining Clinical and Radiomic Data in Testicular Cancer
Source: Preprints.org preprint supplement (doi:10.20944/preprints202310.1175.v1), 2023-10-18
Supplement: Supplementary file 1 [file supplementary]

## SUPPLEMENTAL MATERIALS

### Supplemental Table S1: Imaging and Preprocessing

| Acquisition and Reconstruction                                                                                                                                                    |                                                                                                                                                                                                |
|-----------------------------------------------------------------------------------------------------------------------------------------------------------------------------------|------------------------------------------------------------------------------------------------------------------------------------------------------------------------------------------------|
| All patients underwent contrast-enhanced CT according to standard clinical scanning protocols:                                                                                    |                                                                                                                                                                                                |
| Tube voltage 100 kV - 120 kV with automatically calculated tube current                                                                                                           |                                                                                                                                                                                                |
| Slice thickness $\leq 3$ mm                                                                                                                                                       |                                                                                                                                                                                                |
| Field of view 300 - 350 mm                                                                                                                                                        |                                                                                                                                                                                                |
| 512 $\times$ 512 matrix                                                                                                                                                           |                                                                                                                                                                                                |
| Brilliance 64 or Brilliance 16 CT scanners                                                                                                                                        |                                                                                                                                                                                                |
| Radiomics analysis was performed on the portal-phase acquisition, delayed 60-70 s after starting contrast injection of weight-matched dose Ultravist® 370 (Bayer Schering Pharma. |                                                                                                                                                                                                |
| For image segmentation and analysis, all reconstructed images were retrieved from the hospital's picture archiving and communication system (PACS).                               |                                                                                                                                                                                                |
| ROI-Segmentation, Texture Analysis and Feature Extraction                                                                                                                         |                                                                                                                                                                                                |
| Software                                                                                                                                                                          | Three-dimensional region of interest segmentation, texture analysis and feature extraction were performed using Mint Lesion™ software (version 3.8.4, mint Medical GmbH, Heidelberg, Germany). |
| Settings of the Radiomics Feature Extraction                                                                                                                                      |                                                                                                                                                                                                |
| Bin Method                                                                                                                                                                        | FBN                                                                                                                                                                                            |
| Bin Amount                                                                                                                                                                        | 32                                                                                                                                                                                             |
| LoG Filter                                                                                                                                                                        | 0                                                                                                                                                                                              |
| LoG Sigma                                                                                                                                                                         | 2                                                                                                                                                                                              |
| Matrix Aggregation                                                                                                                                                                |                                                                                                                                                                                                |
| Method                                                                                                                                                                            | 3D Average                                                                                                                                                                                     |
| Directions                                                                                                                                                                        |                                                                                                                                                                                                |
| Resample Filter                                                                                                                                                                   | 1                                                                                                                                                                                              |
| Resample Spacing X                                                                                                                                                                | 1                                                                                                                                                                                              |
| Resample Spacing Y                                                                                                                                                                | 1                                                                                                                                                                                              |
| Resample Spacing Z                                                                                                                                                                | 1                                                                                                                                                                                              |
| Second-Order Distance                                                                                                                                                             | 1                                                                                                                                                                                              |
| Threshold Filter                                                                                                                                                                  | 0                                                                                                                                                                                              |
| Image Biomarker Computation / Parameters                                                                                                                                          |                                                                                                                                                                                                |
| Radiomics Features of First Order                                                                                                                                                 |                                                                                                                                                                                                |
| Intensity-Based Features                                                                                                                                                          | Intensity Minimum                                                                                                                                                                              |
|                                                                                                                                                                                   | Intensity Maximum                                                                                                                                                                              |
|                                                                                                                                                                                   | Intensity Range                                                                                                                                                                                |
|                                                                                                                                                                                   | Intensity Mean                                                                                                                                                                                 |
|                                                                                                                                                                                   | Intensity Variance                                                                                                                                                                             |
|                                                                                                                                                                                   | Intensity Standart Deviation                                                                                                                                                                   |
|                                                                                                                                                                                   | Intensity Skewness                                                                                                                                                                             |
|                                                                                                                                                                                   | Intensity Kurtosis                                                                                                                                                                             |
|                                                                                                                                                                                   | Intensity Energy                                                                                                                                                                               |
|                                                                                                                                                                                   | Intensity P10th                                                                                                                                                                                |

Intensity P25th  
Intensity P50th  
Intensity P75th  
Intensity P90th  
Intensity Root Mean Square  
Intensity Mean Absolute Deviation  
Intensity Robust Mean Absolute Deviation  
Intensity Median Absolute Deviation  
Intensity Coefficient Variation  
Intensity Quartile Coefficient Dispersion  
Intensity Interquartile Range 44

**Intensity Histogram  
Features**

Histogram Minimum  
Histogram Maximum  
Histogram Range  
Histogram Mean  
Histogram Variance  
Histogram Standart Deviation  
Histogram Skewness  
Histogram Kurtosis  
Histogram Entropy  
Histogram Uniformity  
Histogram Mean Absolute Deviation  
Histogram Robust Mean Absolute Deviation  
Histogram Median Absolute Deviation  
Histogram Coefficient Variation  
Histogram Quartile Coefficient Dispersion  
Histogram Interquartile Range  
Histogram P10th  
Histogram P25th  
Histogram P50th  
Histogram P75th  
Histogram P90th  
Histogram Minimum Histogram Gradient Intensity  
Histogram MaximumHistogram Gradient Intensity

**Radiomics Features of Second Order:**

**Gray Level Co-Occurrence Matrix  
(GLCM) Features**

Joint Maximum  
Joint Average  
Standart Deviation  
Joint Variance  
Joint Entropy  
Difference Average  
Difference Variance  
Difference Entropy  
Sum of Averages  
Sum of Variance  
Sum of Entropy

Angular Second Moment  
 Contrast  
 Dissimilarity  
 Inverse Difference  
 Inverse Difference Normalised  
 Inverse Difference Moment  
 Inverse Difference Moment Normalised  
 Joint Maximum  
 Joint Average  
 Standart Deviation  
 Joint Variance  
 Joint Entropy  
 Difference Average  
 Difference Variance  
 Difference Entropy  
 Sum of Averages  
 Sum of Variance  
 Sum of Entropy  
 Angular Second Moment  
 Contrast  
 Dissimilarity  
 Inverse Variance  
 Correlation  
 Auto Correlation  
 Cluster Shade  
 Cluster Prominence  
 Cluster Tendency  
 Information Correlation 1  
 Information Correlation 2  
 Inverse Variance 41

## Supplemental Table S2: Machine learning predictive models

- We used four classic machine learning algorithms to identify the best radiomics model for predicting lymph node metastases in testicular cancer: Random Forest (RF), Light Gradient Boosting Machine (LGBM), Support Vector Machine Classifier (SVC), and K-nearest neighbors (KNN) classifiers. The open-source Python machine learning library Scikit-learn was used to implement the algorithms (1).
- The Random Forest algorithm (RF) (2) is an ensemble classifier that produces multiple decision trees using randomly selected subsamples of the data set. The prediction is achieved by averaging the predictions of all decision trees.
- The LGBM (Light Gradient Boosting Machine) (3,4) is a gradient boosting framework that uses a histogram-based learning approach. It's designed for speed and performance, using light memory and parallel computing to handle large datasets and provide accurate predictions.
- The Support Vector Machine classifier (SVC) is a powerful classification algorithm that works by finding the best hyperplane to separate different classes in the data. It aims to maximize the margin between classes, making it highly effective for both linear and non-linear classification tasks (5).

- Also known as "instance-based" learning, because the hypotheses are built from the training instances, the K-Nearest Neighbours (KNN) algorithm (6,7) is based on distance calculations between instances. The basis of KNN is the calculation of distances between instances, which are the labels of the training instances. Classification is based on the labels of the nearest neighbours.
- To improve the model's performance and maximise the area under the receiver operating characteristic curve (AUC-ROC), the optimal hyperparameters of the model were determined using a grid search procedure (8).

| Hyperparameters determined by grid search |                                                                        |
|-------------------------------------------|------------------------------------------------------------------------|
| Random Forest                             | 'max_depth': 8 and criterion 'gini'                                    |
| K-nearest Neighbour                       | Neighbours: 7                                                          |
| Support Vector Machine classifier         | 'nu' = 0.5,                                                            |
| Light Gradient Boosting Machine           | 'boosting_type': 'gbdt', 'learning_rate': 0.1, 'min_child_samples': 20 |

| Software for Model Development |                                                                                                                                                                                                                                                                                                                                 |
|--------------------------------|---------------------------------------------------------------------------------------------------------------------------------------------------------------------------------------------------------------------------------------------------------------------------------------------------------------------------------|
| Python Random Forest           | 'The machine learning-based feature selection and construction of the clinical and radiomics model were conducted using custom-developed software implemented with the Python Scikit-learn package (Python version 3.10, Scikit-learn version 0.23.3, <a href="http://scikit-learn.org/">http://scikit-learn.org/</a> ) (1, 8). |

**Supplemental Table S3:** Clinicopathological Characteristics of the Patients

|                                                     |                          |
|-----------------------------------------------------|--------------------------|
| Average Age (Range)                                 | 35.2 ± 9.4 Years (18–63) |
| <b>Histological Type</b>                            |                          |
| Seminoma                                            | 60 Patients (66 %)       |
| Non-Seminoma                                        | 31 Patients (34%)        |
| <b>Tumor Classification (T Status)</b>              |                          |
| T1a                                                 | 64 (70%)                 |
| T1b                                                 | 27 (30%)                 |
| <b>Tumor Marker</b>                                 |                          |
| AFP positive                                        | 21 Patients (19%)        |
| B HCG positive                                      | 40 Patients (44%)        |
| AFP und B HCG positive                              | 10 Patients (11%)        |
| BMI (Range)                                         | 25.9 ± 4.6 (19.3 –43.9)  |
| <b>Patients' Status in 6-Year Follow up</b>         |                          |
| Complete remission (CR)                             | 81 (89 %)                |
| Relapse of Disease (RD) with Metastatic Lymph Nodes | 10 (11 %)                |

|              |            |
|--------------|------------|
| Seminoma     | 6 Patients |
| Non-Seminoma | 4 Patients |

**Supplemental Table S4:** Performance of the Radiomics-only, Clinical-only and Combined Clinical-Radiomics Models of all Classifiers

| Classifier                  | AUC (95% CI) | Accuracy    | Precision   | Recall      | F1 Score    |
|-----------------------------|--------------|-------------|-------------|-------------|-------------|
| <b>Random Forest</b>        |              |             |             |             |             |
| Radiomics-only              | 0.92 ± 0.04  | 0.85 ± 0.05 | 0.85 ± 0.05 | 0.85 ± 0.11 | 0.85 ± 0.05 |
| Clinical-only               | 0.88 ± 0.04  | 0.79 ± 0.07 | 0.89 ± 0.04 | 0.65 ± 0.09 | 0.75 ± 0.06 |
| Combined clinical-radiomics | 0.95 ± 0.03  | 0.87 ± 0.06 | 0.89 ± 0.04 | 0.86 ± 0.13 | 0.87 ± 0.06 |
| <b>LGBM</b>                 |              |             |             |             |             |
| Radiomics-only              | 0.93 ± 0.03  | 0.85 ± 0.04 | 0.86 ± 0.05 | 0.84 ± 0.09 | 0.85 ± 0.04 |
| Clinical-only               | 0.86 ± 0.05  | 0.73 ± 0.05 | 0.79 ± 0.06 | 0.63 ± 0.07 | 0.69 ± 0.05 |
| Combined clinical-radiomics | 0.93 ± 0.05  | 0.83 ± 0.07 | 0.87 ± 0.05 | 0.80 ± 0.14 | 0.82 ± 0.08 |
| <b>SVM</b>                  |              |             |             |             |             |
| Radiomics-only              | 0.71 ± 0.05  | 0.68 ± 0.06 | 0.65 ± 0.06 | 0.80 ± 0.07 | 0.71 ± 0.05 |
| Clinical-only               | 0.69 ± 0.12  | 0.63 ± 0.07 | 0.70 ± 0.15 | 0.50 ± 0.20 | 0.55 ± 0.11 |
| Combined clinical-radiomics | 0.71 ± 0.06  | 0.68 ± 0.07 | 0.65 ± 0.07 | 0.80 ± 0.07 | 0.71 ± 0.06 |
| <b>KNN</b>                  |              |             |             |             |             |
| Radiomics-only              | 0.51 ± 0.04  | 0.80 ± 0.03 | 0.17 ± 0.13 | 0.12 ± 0.08 | 0.14 ± 0.09 |
| Clinical-only               | 0.48 ± 0.06  | 0.79 ± 0.06 | 0.05 ± 0.12 | 0.05 ± 0.12 | 0.05 ± 0.12 |
| Combined clinical-radiomics | 0.73 ± 0.04  | 0.67 ± 0.04 | 0.67 ± 0.05 | 0.69 ± 0.08 | 0.67 ± 0.04 |

#### References:

1. Pedregosa F, Varoquaux G, Gramfort A, Michel V, Thirion B, Grisel O, et al. Scikit-learn: Machine learning in Python. the Journal of machine Learning research. 2011;12:2825–30.
2. Breiman L. Random Forests. Machine Learning. 2001 Oct 1;45(1):5–32.
3. Alzamzami F, Hoda M, El Saddik A. Light gradient boosting machine for general sentiment classification on short texts: a comparative evaluation. IEEE access. 2020;8:101840–58.
4. Ke G, Meng Q, Finley T, Wang T, Chen W, Ma W, et al. Lightgbm: A highly efficient gradient boosting decision tree. Advances in neural information processing systems. 2017;30.
5. Cervantes J, Garcia-Lamont F, Rodríguez-Mazahua L, Lopez A. A comprehensive survey on support vector machine classification: Applications, challenges and trends. Neurocomputing. 2020;408:189–215.
6. Pisner DA, Schnyer DM. Support vector machine. In: Machine learning. Elsevier; 2020. p. 101–21.
7. Laaksonen J, Oja E. Classification with learning k-nearest neighbors. In IEEE; 1996. p. 1480–3.
8. Agrawal T, Agrawal T. Hyperparameter optimization using scikit-learn. Hyperparameter optimization in machine learning: make your machine learning and deep learning models more efficient. 2021;31–51.
